# Supplementary material for: Plasma Hepatitis E Virus Kinetics in Solid Organ Transplant Patients Receiving Ribavirin
Source: PubMed Central journal article supplement (PMC6669701; doi:10.3390/v11070630), 2019-07-09
Supplement: viruses-11-00630-s001.pdf [file viruses-11-00630-s001.pdf]

## Supplementary Data

**Table S1.** Details of Patients with Monophasic Viral Load Decline.

| Patient | Response | Baseline                              |              | First                                         |                                     | Time                     |                          | Time to first TND in stool [days] |
|---------|----------|---------------------------------------|--------------|-----------------------------------------------|-------------------------------------|--------------------------|--------------------------|-----------------------------------|
|         |          | HEV RNA [log <sub>10</sub> copies/mL] | Delay [days] | phase slope [log <sub>10</sub> copies/mL/day] | First phase t <sub>1/2</sub> [days] | Time to first DNQ [days] | Time to first TND [days] |                                   |
| 3 ↓     | SVR      | 4.35                                  | 7            | 0.49*                                         | 0.61                                |                          | 15                       | 30                                |
| 6 ↓     | SVR      | 5.27                                  | 3            | 0.44*                                         | 0.68                                |                          | 15 <sup>+</sup>          | 21                                |
| 9       | SVR      | 6.54                                  | 0            | 0.08                                          | 3.56                                |                          | 84                       | 60                                |
| 10 ↓    | SVR      | 3.53                                  | 0            | 0.11*                                         | 2.72                                |                          | 56                       | 30                                |
| 13      | SVR      | 5.85                                  | 3            | 0.12                                          | 2.54                                | 56                       | 84                       | 90                                |
| 14      | SVR      | 4.34                                  | 0            | 0.12*                                         | 2.49                                | 15                       | 56                       | 60                                |
| 17      | SVR      | 3.56                                  | 3            | 0.26*                                         | 1.17                                | 14                       | 56                       | 60                                |
| 19      | SVR      | 6.98                                  | 0            | 0.12*                                         | 2.45                                |                          | 56 <sup>+</sup>          | 30                                |
| 24      | SVR      | 5.30                                  | 0            | 0.24*                                         | 1.26                                |                          | 21                       | MD                                |
| 26 ↓    | SVR      | 5.23                                  | 3            | 0.30*                                         | 1.01                                |                          | 21                       | MD                                |
| 28      | SVR      | 5.78                                  | 7            | 0.11*                                         | 2.85                                |                          | 56                       | 90                                |
| 32 ↓    | SVR      | 6.41                                  | 0            | 0.20                                          | 1.48                                |                          | 28                       | MD                                |
| 5 ↓     | Relapse  | 6.28                                  | 7            | 0.24*                                         | 1.26                                |                          | 15                       | \$                                |
| 7 ↓     | Relapse  | 6.22                                  | 7            | 0.13                                          | 2.31                                |                          | 56 <sup>+</sup>          | \$                                |

|             |         |        |     |        |        |    |      |      |
|-------------|---------|--------|-----|--------|--------|----|------|------|
| 15 ↓        | Relapse | 5.42   | 21  | 0.14*  | 2.14   |    | 56   | \$   |
| 31          | Relapse | 6.83   | 0   | 0.10   | 3.15   |    | 84   | 60   |
| 34          | Relapse | 6.64   | 3   | 0.16   | 1.87   |    | 56   | \$   |
| 36          | Relapse | 5.12   | 0   | 0.13   | 2.28   |    | 56   | \$   |
| 18 patients | Median  | 5.60   | 3   | 0.14   | 2.21   | 15 | 56   | 60   |
|             | (IQR)   | (1.51) | (7) | (0.13) | (1.35) |    | (35) | (38) |

DNQ = viral load (VL) detected but not quantifiable, assumed VL = 10 copies/mL for calculations; TND = target not detected, assumed VL = 1 copy/mL for calculations;  $t_{1/2}$  = half-life; delay = time until treatment induced viral decline; \* = minimal estimates, calculated using viral load recorded as TND or DNQ; † = viral blip after TND; \$ = positive at end of treatment (EOT); MD = missing data; ↓ = decrease of ribavirin dose.

**Table S2.** Details of Patients with Biphasic Viral Decline.

| Patients          | Response | Baseline<br>HEV/RNA<br>[log <sub>10</sub><br>copies/<br>mL] | Delay<br>[days] | First                                                      |                                    | Second                                       |                                                            |                                              | Time<br>to<br>first<br>DNQ<br>[days] | Time<br>to<br>first<br>TND<br>[days] | Time<br>to<br>first<br>TND<br>in<br>stool<br>[days] |
|-------------------|----------|-------------------------------------------------------------|-----------------|------------------------------------------------------------|------------------------------------|----------------------------------------------|------------------------------------------------------------|----------------------------------------------|--------------------------------------|--------------------------------------|-----------------------------------------------------|
|                   |          |                                                             |                 | phase<br>slope<br>[log <sub>10</sub><br>copies/<br>mL/day] | First<br>phase<br>length<br>[days] | First<br>phase<br>t <sub>1/2</sub><br>[days] | phase<br>slope<br>[log <sub>10</sub><br>copies/<br>mL/day] | Final<br>phase<br>t <sub>1/2</sub><br>[days] |                                      |                                      |                                                     |
| 1                 | SVR      | 7.35                                                        | 0               | 0.25                                                       | 7                                  | 1.23                                         | 0.12                                                       | 2.59                                         | 56                                   | 60                                   |                                                     |
| 4 <sup>^</sup>    | SVR      | 7.03                                                        | 0               | 0.17                                                       | 7                                  | 1.74                                         | 0.73*                                                      | 0.41                                         | 15                                   | 30                                   |                                                     |
| 29                | SVR      | 6.66                                                        | 0               | 0.14                                                       | 15                                 | 2.10                                         | 0.06*                                                      | 4.76                                         | 84                                   | 90                                   |                                                     |
| 35                | SVR      | 6.75                                                        | 7               | 0.17                                                       | 14                                 | 1.79                                         | 0.05*                                                      | 5.80                                         | 84                                   | 90                                   |                                                     |
| 38 <sup>^</sup> ↓ | SVR      | 4.70                                                        | CE              | 0.09 <sup>#</sup>                                          | 15                                 | 3.19                                         | 0.55*                                                      | 0.55                                         | 21                                   | MD                                   |                                                     |
| 40 <sup>^</sup>   | SVR      | 6.40                                                        | 3               | 0.15                                                       | 18                                 | 1.95                                         | 0.38*                                                      | 0.80                                         | 28                                   | 84                                   |                                                     |
| 11 <sup>^</sup>   | SVR      | 6.48                                                        | 0               | 0.06                                                       | 15                                 | 4.74                                         | 0.14                                                       | 2.10                                         | 56                                   | 84                                   |                                                     |
| 16 <sup>^</sup> ↓ | SVR      | 5.54                                                        | 0               | 0.11                                                       | 15                                 | 2.75                                         | 0.30*                                                      | 1.01                                         | 28                                   | 30                                   |                                                     |
| 30 <sup>^</sup> ↓ | Relapse  | 6.93                                                        | 0               | 0.06                                                       | 15                                 | 4.66                                         | 0.23                                                       | 1.32                                         | 56                                   | 21 <sup>!</sup>                      |                                                     |
| 2                 | Relapse  | 5.15                                                        | 7               | 0.20                                                       | 14                                 | 1.51                                         | 0.06*                                                      | 5.27                                         | 56                                   | 60                                   |                                                     |
| 12                | Relapse  | 6.24                                                        | 3               | 0.15                                                       | 18                                 | 2.05                                         | 0.06                                                       | 5.19                                         | 56                                   | 84                                   |                                                     |
| 23                | Relapse  | 6.24                                                        | 0               | 0.33                                                       | 3                                  | 0.92                                         | 0.12                                                       | 2.44                                         | 84                                   | 15 <sup>§</sup>                      |                                                     |
| 33 <sup>^</sup> ↓ | Relapse  | 6.45                                                        | 0               | 0.13                                                       | 15                                 | 2.29                                         | 0.33*                                                      | 0.91                                         | 28                                   | MD                                   |                                                     |
| 13                | Median   | 6.45                                                        | 0.00            | 0.15                                                       | 15.00                              | 2.05                                         | 0.14                                                       | 2.10                                         | 56                                   | 56                                   |                                                     |

|          |       |        |        |       |        |        |       |        |      |      |
|----------|-------|--------|--------|-------|--------|--------|-------|--------|------|------|
| Patients | (IQR) | (0.95) | (3.00) | (0.1) | (4.50) | (1.34) | (0.3) | (4.12) | (56) | (59) |
|----------|-------|--------|--------|-------|--------|--------|-------|--------|------|------|

DNQ = viral load (VL) detected but not quantifiable, assumed VL = 10 copies/mL for calculations; TND = target not detected, assumed VL = 1 copy/mL for calculations;  $t_{1/2}$  = half-life; delay = time until treatment induced viral decline; \* = minimal estimates, calculated using viral load recorded as TND or DNQ; + = viral blip after TND; ^ = the viral decline pattern in these patients was defined by a slower first phase and a faster second phase, which is opposite to the rest of the biphasic viral decline patterns observed; CE = cannot be estimated due to lack of data points; # = minimal estimate of first phase slope since delay cannot be estimated; \* = denotes that the slopes are minimal estimates, calculated using viral load recorded as TND or DNQ; ! = no data at end of treatment (EOT); \$ = positive at EOT; ↓ = decrease of ribavirin dose; MD = missing data.

Table S3. Details of Patients with Triphasic Viral Decline.

| Patient | Response | Baseline<br>HEV/RNA<br>[log <sub>10</sub><br>copies/<br>mL] | Delay<br>[days] | First                                                      | Shoulder                           |                                               |                                                            | Mean                              | Final                                                    | t <sub>1/2</sub> of<br>final<br>phase<br>[days] | Time<br>to<br>DNQ<br>[days] | Time<br>to<br>TND<br>[days] | Time<br>to<br>TND<br>in<br>stool<br>[days] |                                                            |
|---------|----------|-------------------------------------------------------------|-----------------|------------------------------------------------------------|------------------------------------|-----------------------------------------------|------------------------------------------------------------|-----------------------------------|----------------------------------------------------------|-------------------------------------------------|-----------------------------|-----------------------------|--------------------------------------------|------------------------------------------------------------|
|         |          |                                                             |                 | phase<br>slope<br>[log <sub>10</sub><br>copies/<br>mL/day] | First<br>phase<br>length<br>[days] | First<br>phase:<br>t <sub>1/2</sub><br>[days] | phase<br>slope<br>[log <sub>10</sub><br>copies/<br>mL/day] | Length<br>of<br>plateau<br>[days] | VL at<br>plateau<br>[log <sub>10</sub><br>copies/<br>mL] |                                                 |                             |                             |                                            | phase<br>slope<br>[log <sub>10</sub><br>copies/<br>mL/day] |
| 8 ↑     | SVR      | 4.43                                                        | 7               | 0.14                                                       | 7                                  | 2.20                                          | 0.01                                                       | 13                                | 3.27                                                     | 0.06*                                           | 5.35                        | 84                          | 90                                         |                                                            |
| 20      | SVR      | 5.03                                                        | 0               | 0.37                                                       | 3                                  | 0.80                                          | 0.01                                                       | 12                                | 4.04                                                     | 0.22*                                           | 1.34                        | 28                          | 56                                         | MD                                                         |
| 21      | SVR      | 4.13                                                        | 0               | 0.16                                                       | 7                                  | 1.87                                          | 0.05                                                       | 14                                | 2.69                                                     | 0.33*                                           | 0.90                        | 28                          | 21                                         |                                                            |
| 22      | SVR      | 5.39                                                        | 3               | 0.11                                                       | 21                                 | 2.81                                          | [0.01]                                                     | 7                                 | 3.19                                                     | 0.12*                                           | 2.62                        | 56                          | MD                                         |                                                            |
| 39      | SVR      | 5.96                                                        | 7               | 0.15                                                       | 14                                 | 2.02                                          | 0.02                                                       | 28                                | 2.30                                                     | 0.07*                                           | 4.21                        | 84                          | 60                                         |                                                            |
| 18      | Relapse  | 5.57                                                        | 0               | 0.19                                                       | 15                                 | 1.55                                          | 0.00                                                       | 13                                | 2.88                                                     | 0.05*                                           | 6.39                        | 84                          | MD                                         |                                                            |

|          |         |        |     |        |      |        |        |     |        |        |        |       |                 |    |
|----------|---------|--------|-----|--------|------|--------|--------|-----|--------|--------|--------|-------|-----------------|----|
| 25       | Relapse | 5.38   | 0   | 0.46   | 3    | 0.66   | 0.01   | 18  | 4.09   | 0.53*  | 0.57   | 28    | \$              |    |
| 27       | Relapse | 5.83   | 0   | 0.30   | 3    | 1.01   | 0.03   | 18  | 5.47   | 0.13*  | 2.24   | 56    | 60 <sup>§</sup> |    |
| 8        | Median  | 5.39   | 0   | 0.18   | 7    | 1.71   | 0.01   | 14  | 3.23   | 0.13   | 2.43   | 28.00 | 56              | 60 |
| Patients | (IQR)   | (1.19) | (6) | (0.21) | (12) | (1.30) | (0.03) | (6) | (1.34) | (0.24) | (4.06) | (49)  | (52)            |    |

DNQ = viral load (VL) detected but not quantifiable, assumed VL = 10 copies/mL for calculations; TND = target not detected, assumed VL = 1 copy/mL for calculations;  $t_{1/2}$  = half-life; delay = time until treatment induced viral decline; \* = minimal estimates, calculated using viral load recorded as TND or DNQ; + = viral blip after TND; [ ] = positive slope, VL increasing; \* = denotes that the slopes are minimal estimates, calculated using viral load recorded as TND or DNQ; \$ = positive at end of treatment (EOT); ↑ = increase of ribavirin dose; MD = missing data.

**Table S4.** Details of Patients with Flat-Partial Response.

| Patient  | Response | Baseline                             |        | First                                    |                  |                            | Second                                   | Mean                                 | Time to                   |
|----------|----------|--------------------------------------|--------|------------------------------------------|------------------|----------------------------|------------------------------------------|--------------------------------------|---------------------------|
|          |          | HEV<br>RNA                           | Delay  | phase<br>slope                           | First<br>phase   | First<br>phase             | phase<br>plateau<br>slope                | VL at<br>plateau                     | TND in<br>stool<br>[days] |
|          |          | [log <sub>10</sub><br>copies/<br>mL] | [days] | [log <sub>10</sub><br>copies/<br>mL/day] | length<br>[days] | t <sub>1/2</sub><br>[days] | [log <sub>10</sub><br>copies/<br>mL/day] | [log <sub>10</sub><br>copies/<br>mL] |                           |
| 37 ↑     | Relapse  | 7.12                                 | 0      | 0.18                                     | 28               | 1.66                       | 0.01                                     | 2.15 <sup>&amp;</sup>                | MD                        |
| 41 ↑     | Relapse  | 6.21                                 | 7      | 0.22                                     | 14               | 1.34                       | 0.01                                     | 3.89                                 | \$                        |
| Patients | Median   | 6.67                                 | 3.50   | 0.20                                     | 21               | 1.50                       | 0.01                                     | 3.02                                 |                           |

t<sub>1/2</sub> = half-life; delay = time until treatment induced viral decline; VL = viral load; <sup>&</sup> = viral load detectable but not quantifiable (DNQ) at day 56 (assumed VL = 10 copies/mL for calculations); MD = missing data; \$ = positive at EOT; TND = target not detected; ↑ = increase of ribavirin dose.

**Table S5.** Viral Kinetic Patterns and HEV RNA in Plasma and Stool at the End of Ribavirin Treatment (EOT).

| HEV RNA at EOT |       | SVR        |          |           | Non-SVR    |          |           |               |
|----------------|-------|------------|----------|-----------|------------|----------|-----------|---------------|
| Plasma         | Stool | Monophasic | Biphasic | Triphasic | Monophasic | Biphasic | Triphasic | Flat-partial* |
| neg            | neg   | 9          | 5        | 3         | 1          | 1        | 0         | 0             |
| neg            | pos   | 0          | 0        | 0         | 4          | 2        | 2         | 0             |
| pos            | pos   | 0          | 0        | 0         | 1          | 0        | 0         | 1             |

neg = HEV RNA not detected; pos = HEV RNA detected; \* = flat-partial responders ( $n = 2$ ) were both HEV RNA positive in plasma at EOT measurement in stool was available only in one patient (Figure 1G–H).
